# Supplementary material for: Clinical, genetic, neurophysiological and functional study of new mutations in episodic ataxia type 1
Source: PubMed Central journal article supplement — J Neurol Neurosurg Psychiatry. 2013 Jan 24;84(10):1107–12. doi: 10.1136/jnnp-2012-304131 (PMC4332158; doi:10.1136/jnnp-2012-304131), 2013-01-24
Supplement: jnnp-2012-304131-s1.pdf [file jnnp-2012-304131-s1.pdf]

| <b>Supplementary Table 1: <i>KCNA1</i> Primers</b> |                                                   |                             |                            |
|----------------------------------------------------|---------------------------------------------------|-----------------------------|----------------------------|
|                                                    | <b>Nucleotide position<br/>(A of the ATG = 1)</b> | <b>Forward Primer</b>       | <b>Reverse Primer</b>      |
| <b>Fragment 1</b>                                  | From -67 to 373                                   | 5'-ctggtcctggctgcttc-3'     | 5'-cctcgcccaactcgtaaaac-3' |
| <b>Fragment 2</b>                                  | From 264 to 706                                   | 5'-cgcagctcaagaccctggcg -3' | 5'-gaaggggtctgtgaagatgt-3' |
| <b>Fragment 3</b>                                  | From 569 to 1008                                  | 5'-ccgagctgaaggatgacaa-3'   | 5'-cccgatgaagaggaaaaaga-3' |
| <b>Fragment 4</b>                                  | From 864 to 1301                                  | 5'-ggccatcctcagggtcat-3'    | 5'-taggggaactgacgtggag-3'  |
| <b>Fragment 5</b>                                  | From 1124 to +42                                  | 5'-acggtgacatgtaccctgtg-3'  | 5'-agctgctaagtgggctttt-3'  |

\*M13 tails were included in all primers.

| <b>Supplementary Table 2: PCR Conditions for primers</b> |                         |                           |               |
|----------------------------------------------------------|-------------------------|---------------------------|---------------|
| <b>Step</b>                                              | <b>Temperature (°C)</b> | <b>Duration (minutes)</b> | <b>Cycles</b> |
| <b>Denaturing</b>                                        | 94                      | 5                         | 1             |
| <b>Amplification</b>                                     | 95                      | 0.5                       | 30            |
|                                                          | 55                      | 0.5                       |               |
|                                                          | 72                      | 0.5                       |               |
| <b>Elongation</b>                                        | 72                      | 7                         | 1             |

**Supplementary Table 3: Clinical features in Episodic Ataxia Type 1**

| <b>Family<br/>(mutation)</b> | <b>Subject<br/>(Sex;age)</b> | <b>Ataxic phenotype</b>                                                                                                                                                                                                                                                      | <b>Seizures</b> | <b>Neuro-<br/>myotonia</b> | <b>Other</b>                                                                                             |
|------------------------------|------------------------------|------------------------------------------------------------------------------------------------------------------------------------------------------------------------------------------------------------------------------------------------------------------------------|-----------------|----------------------------|----------------------------------------------------------------------------------------------------------|
| <b>Family A<br/>(R167M)</b>  | I:1<br>(F; 55)               | Onset age 12; gait ataxia and dysarthria lasting 1-2 min; precipitated by change in position and sudden movement; Frequency peaked in adolescence 8 per day and receded in adulthood.                                                                                        | No              | Yes                        |                                                                                                          |
|                              | II:3 *<br>(M; 25)            | Onset age 15 during sport; gait and limb ataxia with dysarthria lasting 4-5 min; predictably occur during sport.; triggered by startle and change in position; frequency diminished in adulthood with altered activity. Episodes necessitated job change.                    | No              | Yes                        | Hearing impairment attributed to chronic otitis media in infancy resulting in delayed speech.            |
| <b>Family B<br/>(C185T)</b>  | I:1<br>(F; 55)               | Onset age 10; gait and limb ataxia usually brief but last up to 10 min; brought on by dancing, sport, sudden movement, change in position intercurrent illness; frequency now 3-4 per month.                                                                                 | No              | No                         |                                                                                                          |
|                              | II:3<br>(M; 37)              | Onset age 10; phenotype dominated by flexion posturing of distal limbs, carpedal spasm and muscle stiffness which can last hours often triggered by fever or exertion.                                                                                                       | No              | Yes                        | Hearing impairment attributed to childhood measles                                                       |
|                              | II:4<br>(F; 29) *            | Onset age 12; gait and limb ataxia with dysarthria; triggered by exertion, change in position, fever, sudden movement; duration less than 10 min; 1-2 episodes per year; abating with age; also experiences muscle stiffness and carpedal spasm (less profound than sibling) | No              | Yes                        | Two of four children have intermittent muscle stiffness and difficulty walking during febrile illnesses. |
| <b>Family C<br/>(I407M)</b>  | II:2<br>(F; 92)              | Onset age 10; 1-2 min duration; predominantly gait ataxia and dysarthria; sometimes blurred vision. No episodes since age 34.                                                                                                                                                | No              | Yes                        | Hearing impairment                                                                                       |
|                              | III:1<br>(F; 62)             | Onset age 14; gait ataxia and dysarthria; 1 min duration; peak frequency in adolescence, nil since age 34; predictably triggered by sport; sometimes triggered by febrile illness.                                                                                           | No              | Yes                        |                                                                                                          |
|                              | III:2<br>(F; 58)             | Onset age 4; gait and limb ataxia and dysarthria; predictably triggered by sport; also triggered by sudden movement, change in position, emotion. Daily episodes in youth, now 5 per year.                                                                                   | No              | Yes                        | Mild hearing impairment                                                                                  |

|                             |                   |                                                                                                                                                                                                                                            |                                                                     |     |                          |
|-----------------------------|-------------------|--------------------------------------------------------------------------------------------------------------------------------------------------------------------------------------------------------------------------------------------|---------------------------------------------------------------------|-----|--------------------------|
|                             | III:4*<br>(M; 64) | Onset age 13, prodrome of flash in head; gait and limb ataxia with dysarthria and blurred vision; predictably triggered by sport; duration 1 min;                                                                                          | No                                                                  | Yes |                          |
|                             | IV:1<br>(F; 37)   | Onset age 13; prodrome followed by gait ataxia and dysarthria; frequency peaked age 19, now occur every few months; triggered by intercurrent illness.                                                                                     | No                                                                  | Yes |                          |
|                             | IV:2<br>(M; 33)   | Onset age 12; gait ataxia only lasting 30 – 60 s (no dysarthria); predictably triggered by sport; events peaked in adolescence every 2-3 weeks; now seldom occur.                                                                          | No                                                                  | Yes |                          |
|                             | IV:6<br>(M; 29)   | Onset age 8; experiences prodrome; gait and limb ataxia, dysarthria, blurred vision; duration 30 s; occur several times per week; triggered by sport, hunger, emotion, sudden movement, startle, change in position, fever, .              | No                                                                  | Yes |                          |
| <b>Family D<br/>(A242P)</b> | II:1<br>(F; 64)   | Onset age 8; gait and limb ataxia, dysarthria, blurred vision; duration 2 min; 1-2 episodes per year;                                                                                                                                      | No                                                                  | Yes | Right laterocollis       |
|                             | III:1<br>(F; 35)  | Onset age 6, gait and limb ataxia, dysarthria, muscle stiffness and hemifacial spasm; triggers include dancing, diving, stress, exercise, sport; frequency 1-2 per month diminishing with time.                                            | No                                                                  | Yes | Acetazolamide no benefit |
|                             | III:2*<br>(F; 30) | Onset age 6; gait and limb ataxia, dysarthria and muscle spasm with thumb adduction; episodes occur every few months and last 30 s; triggered by sport, exertion, change of temperature, diving into water and sometimes fever and emotion | Yes; 2 nocturnal seizures from age 22; controlled with lamotrigine. | Yes |                          |

\*Indicates proband

| <b>Supplementary Table 4: Clinical neurophysiology</b> |                              |                                                                                                            |                                                                                                                                                                                                                          |
|--------------------------------------------------------|------------------------------|------------------------------------------------------------------------------------------------------------|--------------------------------------------------------------------------------------------------------------------------------------------------------------------------------------------------------------------------|
| <b>Family<br/>(mutation)</b>                           | <b>Subject<br/>(Sex;age)</b> | <b>NCS</b>                                                                                                 | <b>EMG</b>                                                                                                                                                                                                               |
| <b>Family A<br/>(R167M)</b>                            | I:1<br>(F; 55)               | Not performed                                                                                              | Myokymia seen on surface EMG of ADM.                                                                                                                                                                                     |
|                                                        | II:3 *<br>(M; 25)            | Not performed                                                                                              | Myokymia seen on surface EMG of ADM.                                                                                                                                                                                     |
| <b>Family B<br/>(C185T)</b>                            | I:1<br>(F; 55)               | Mild right carpal tunnel syndrome                                                                          | Normal . No myokmia seen in R biceps, 1DIO, TA or gastroc.                                                                                                                                                               |
|                                                        | II:3<br>(M; 37)              | Normal                                                                                                     | R 1DIO - occasional myokymic discharges; R TA sustained myokymic discharges.                                                                                                                                             |
|                                                        | II:4<br>(F; 29) *            | Normal. No afterpotentials seen.                                                                           | R 1DIO and R APB- spontaneous repetitive short bursts of multiplets lasting 20ms, repeating at 3 Hz (intra-burst frequency of 300-400 Hz). Bursts of similar morphology. Occasional slow repetitive doublets in gastroc. |
| <b>Family C<br/>(I407M)</b>                            | III:4*<br>(M; 64)            | Mild sensorimotor axonal neuropathy; No after-potentials seen in motor nerves.                             | Orbicularis oculi - Neuromyotonic discharges; doublets and triplets; sustained. Normal EMG in R frontalis, 1DIO, TA and VM.                                                                                              |
|                                                        | IV:6<br>(M; 29)              | Normal. No after-potentials seen in motor nerves.                                                          | Myokymia seen in R orbicularis oculi and R1DIO. Normal EMG in R deltoid, EDC and TA                                                                                                                                      |
| <b>Family D<br/>(A242P)</b>                            | II:2<br>(F; 64)              | Normal NCS; After-discharges seen in median and ulnar nerves during repetitive 10 Hz and 15 Hz stimulation | Frequent myokymic discharges from R 1DIO, R EDC and R TA.                                                                                                                                                                |
|                                                        | III:1<br>(F; 35)             | Small afterpotentials with repetitive stimulation the R ulnar nerve                                        | Myokymia in R 1DIO only; not seen in face or proximal muscles.                                                                                                                                                           |
|                                                        | III:2*<br>(F; 30)            | Normal. No afterpotentials seen.                                                                           | Occasional myokymic discharges from R 1DIO. Frequent myokymic discharges in R TA.                                                                                                                                        |

\* Probands. NCS = nerve conduction studies. 1DIO = first dorsal interosseous; ADM = abductor digiti minimi; APB = abductor pollicis brevis; EDC = extensor digitorum communis; gastroc = gastrocnemius; TA = tibialis anterior; VM = vastus medialis.
