# Supplementary material for: Clinical, genetic, neurophysiological and functional study of new mutations in episodic ataxia type 1
Source: HighWire-hosted journal article supplement (doi:10.1136/jnnp-2012-304131), 2013-01-24
Supplement: jnnp-2012-304131supp_tables.pdf [file jnnp-2012-304131supp_tables.pdf]

| <b>Supplementary Table 1: <i>KCNA1</i> Primers</b> |                                                   |                             |                            |
|----------------------------------------------------|---------------------------------------------------|-----------------------------|----------------------------|
|                                                    | <b>Nucleotide position<br/>(A of the ATG = 1)</b> | <b>Forward Primer</b>       | <b>Reverse Primer</b>      |
| <b>Fragment 1</b>                                  | From -67 to 373                                   | 5'-ctggtcctggctgcttc-3'     | 5'-cctcgcccaactcgtaaac-3'  |
| <b>Fragment 2</b>                                  | From 264 to 706                                   | 5'-cgcagctcaagaccctggcg -3' | 5'-gaaggggtctgtgaagatgt-3' |
| <b>Fragment 3</b>                                  | From 569 to 1008                                  | 5'-ccgagctgaaggatgacaa-3'   | 5'-cccgatgaagaggaaaaaga-3' |
| <b>Fragment 4</b>                                  | From 864 to 1301                                  | 5'-ggccatcctcagggtcat-3'    | 5'-taggggaactgacgtggag-3'  |
| <b>Fragment 5</b>                                  | From 1124 to +42                                  | 5'-acggtgacatgtaccctgtg-3'  | 5'-agctgctaagtgggctttt-3'  |

\*M13 tails were included in all primers.

| <b>Supplementary Table 2: PCR Conditions for primers</b> |                         |                           |               |
|----------------------------------------------------------|-------------------------|---------------------------|---------------|
| <b>Step</b>                                              | <b>Temperature (°C)</b> | <b>Duration (minutes)</b> | <b>Cycles</b> |
| <b>Denaturing</b>                                        | 94                      | 5                         | 1             |
| <b>Amplification</b>                                     | 95                      | 0.5                       | 30            |
|                                                          | 55                      | 0.5                       |               |
|                                                          | 72                      | 0.5                       |               |
| <b>Elongation</b>                                        | 72                      | 7                         | 1             |
